# Supplementary material for: Synthesis, characterization and application of cyclam-modified magnetic SBA-15 as a novel sorbent and its optimization by central composite design for adsorption and determination of trace amounts of lead ions
Source: Royal Society of Chemistry journal article supplement (doi:10.1039/c6ra21895d), 2016-01-01
Supplement: c6ra21895d1.pdf [file c6ra21895d1.pdf]

## Supplementary information

### Synthesis, characterization and application of Cyclam-modified magnetic SBA-15 as a novel sorbent and its optimization by central composite design for adsorption and determination of trace amount of lead ions

Rouhollah Zare-Dorabei <sup>1,\*</sup>, Maryam Shamsedini Darbandsari <sup>1,2</sup>, Ali Moghimi <sup>2</sup>, Samaneh Nazerdeylami <sup>1</sup>, Mahnaz Saghanejhad Tehrani <sup>1</sup>

<sup>1</sup>Research Laboratory of Spectrometry & Micro and Nano Extraction, Department of Chemistry, Iran University of Science and Technology, Tehran 16846-13114, Iran

<sup>2</sup>Department of Chemistry, Varamin (Pishva) Branch, Islamic Azad University, Varamin, Iran

\* Corresponding author. E-mail address: [Zaredorabei@iust.ac.ir](mailto:Zaredorabei@iust.ac.ir)

## Supplementary information caption

**Table S1.** Matrix for the central composite design (CCD)

**Table S2.** The interfering effect of other ions on the extraction recovery of lead. Conditions: sample volume, 100.0 mL; lead concentration, 30 µg/L; amount of sorbent, 4.0 mg; volume of desorbing solution, 3.0 mL

**Fig. S1.** Cyclam structure

**Fig. S2.** X-ray diffraction patterns (a); FT-IR (b); SEM images(c) of Fe<sub>3</sub>O<sub>4</sub> magnetic nanoparticles.

**Fig. S3.** FT-IR spectrum of the synthesized materials (a,b,c, d)

**Fig. S4.** Sorption/desorption N<sub>2</sub> analysis of SBA-15.

**Fig. S5.** Effect of volume of the sample solution on the extraction recovery of lead ions (Conditions: amount of sorbent, 0.004g; lead concentration, 30 µg/L; volume of the eluent, 3 mL; desorption time, 40min, pH, 4.8).

**Fig. S6.** The equilibrium isotherms (a) Langmuir (b) Freundlich (c) Temkin, for adsorption of Pb(II) ions onto Fe<sub>3</sub>O<sub>4</sub>@ Cyclam-SBA-15 at optimum conditions in some ion concentrations ranging.

**Fig. S7.** The adsorption kinetic curves related to (a) pseudo-first order (b) pseudo-second order and (c) Elovich models for adsorption of Pb(II) ions over Fe<sub>3</sub>O<sub>4</sub>@ Cyclam-SBA-15 at optimum conditions at various contact time.

**Fig. S8.** Regeneration study after five consecutive adsorption/desorption cycles with HCl (0.01M), EDTA (0.01M) and HNO<sub>3</sub> (0.01M) eluent

**Table S1.** Matrix for the central composite design (CCD)

| Run | Block | A  | B  | C | D  | Q <sup>1</sup> (mg/g) |
|-----|-------|----|----|---|----|-----------------------|
| 1   | 1     | 6  | 15 | 4 | 30 | 85.75                 |
| 2   | 1     | 4  | 20 | 5 | 40 | 206.87                |
| 3   | 1     | 8  | 10 | 3 | 20 | 54.07                 |
| 4   | 1     | 8  | 20 | 3 | 40 | 109.96                |
| 5   | 1     | 4  | 10 | 3 | 40 | 132.30                |
| 6   | 1     | 4  | 20 | 3 | 20 | 168.50                |
| 7   | 1     | 6  | 15 | 4 | 30 | 75.07                 |
| 8   | 1     | 8  | 20 | 5 | 20 | 117.00                |
| 9   | 1     | 4  | 10 | 5 | 20 | 79.60                 |
| 10  | 1     | 8  | 10 | 5 | 40 | 57.50                 |
| 11  | 2     | 8  | 10 | 5 | 20 | 54.05                 |
| 12  | 2     | 4  | 20 | 5 | 20 | 197.00                |
| 13  | 2     | 4  | 10 | 3 | 20 | 87.50                 |
| 14  | 2     | 4  | 20 | 3 | 40 | 190.50                |
| 15  | 2     | 6  | 15 | 4 | 30 | 82.04                 |
| 16  | 2     | 6  | 15 | 4 | 30 | 81.42                 |
| 17  | 2     | 8  | 20 | 5 | 40 | 118.56                |
| 18  | 2     | 8  | 10 | 3 | 40 | 69.50                 |
| 19  | 2     | 8  | 20 | 3 | 20 | 86.60                 |
| 20  | 2     | 4  | 10 | 5 | 40 | 94.60                 |
| 21  | 3     | 6  | 15 | 6 | 30 | 69.50                 |
| 22  | 3     | 6  | 5  | 4 | 30 | 41.67                 |
| 23  | 3     | 6  | 15 | 2 | 30 | 67.50                 |
| 24  | 3     | 6  | 15 | 4 | 50 | 121.94                |
| 25  | 3     | 2  | 15 | 4 | 30 | 209.42                |
| 26  | 3     | 6  | 25 | 4 | 30 | 179.59                |
| 27  | 3     | 6  | 15 | 4 | 10 | 87.22                 |
| 28  | 3     | 6  | 15 | 4 | 30 | 83.36                 |
| 29  | 3     | 10 | 15 | 4 | 30 | 75.44                 |
| 30  | 3     | 6  | 15 | 4 | 30 | 79.98                 |

1- Adsorption capacity

Table S2. The interfering effect of other ions on the extraction recovery of lead. Conditions: sample volume, 100.0 mL; lead concentration, 30 µg/L; amount of sorbent, 4.0 mg; volume of desorbing solution, 3.0 mL

| Ions                          | Ion concentration (µg/L) | Recovery (%) | Interference percentage % |
|-------------------------------|--------------------------|--------------|---------------------------|
| Na <sup>+</sup>               | 3000                     | 99.404       | 0.596                     |
|                               | 6000                     | 97.29        | 2.71                      |
| Fe <sup>2+</sup>              | 3000                     | 97.49        | 2.51                      |
|                               | 6000                     | 96.00        | 4.00                      |
| Hg <sup>2+</sup>              | 3000                     | 36.76        | 3.24                      |
|                               | 6000                     | 98.02        | 1.98                      |
| NO <sub>3</sub> <sup>-</sup>  | 3000                     | 95.81        | 4.19                      |
|                               | 6000                     | 95.02        | 3.98                      |
| Cl <sup>-</sup>               | 3000                     | 99.404       | 0.596                     |
|                               | 6000                     | 97.29        | 2.71                      |
| CO <sub>3</sub> <sup>2-</sup> | 3000                     | 99.11        | 0.89                      |
|                               | 6000                     | 95.49        | 4.51                      |
| SO <sub>4</sub> <sup>2-</sup> | 3000                     | 98.79        | 1.21                      |
|                               | 6000                     | 95.46        | 4.54                      |

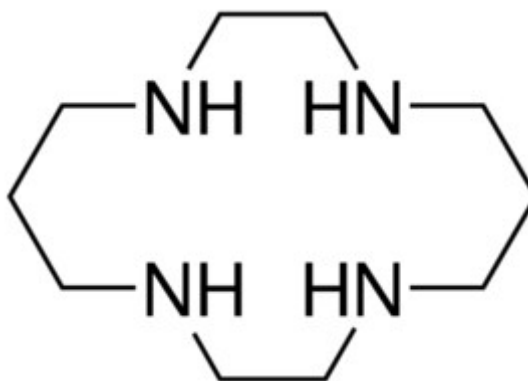

Fig. S1. Cyclam structure

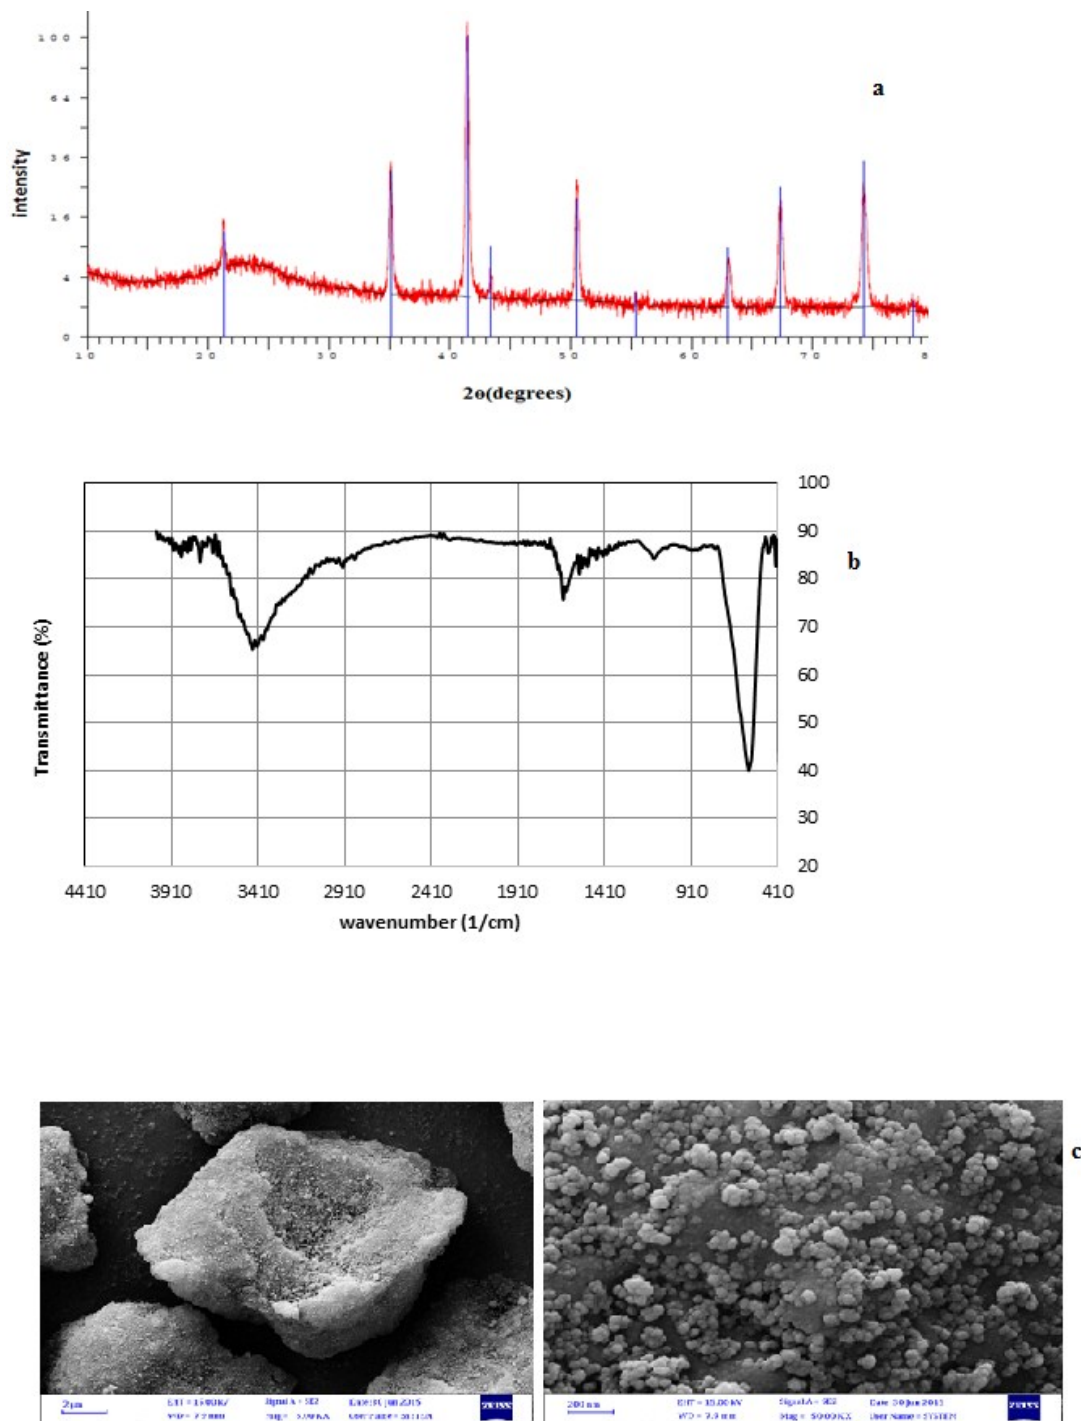

**Fig. S2.** X-ray diffraction patterns (a); FT-IR (b); SEM images(c) of Fe<sub>3</sub>O<sub>4</sub> magnetic nanoparticles.

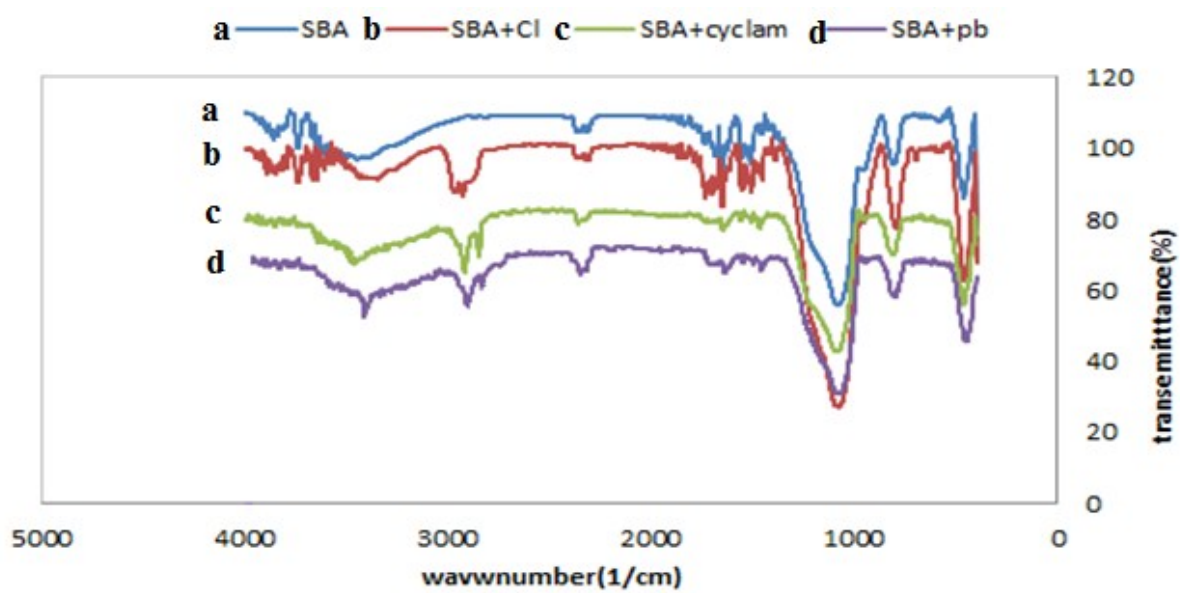

Fig. S3. FT-IR spectrum of the synthesized materials (a,b,c, d)

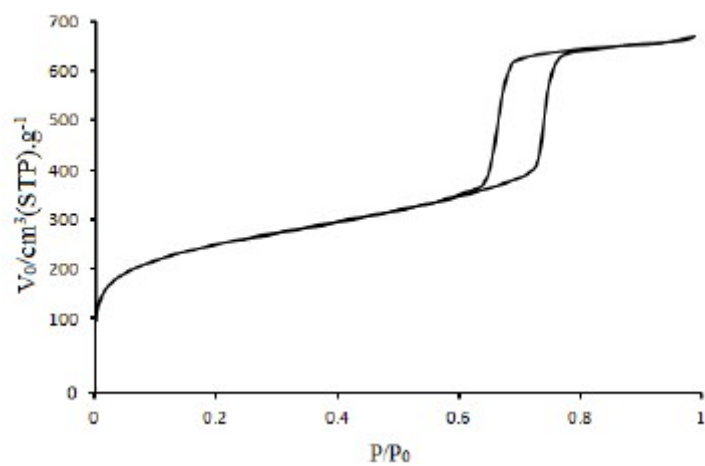

Fig. S4. Sorption/desorption  $\text{N}_2$  analysis of SBA-15.

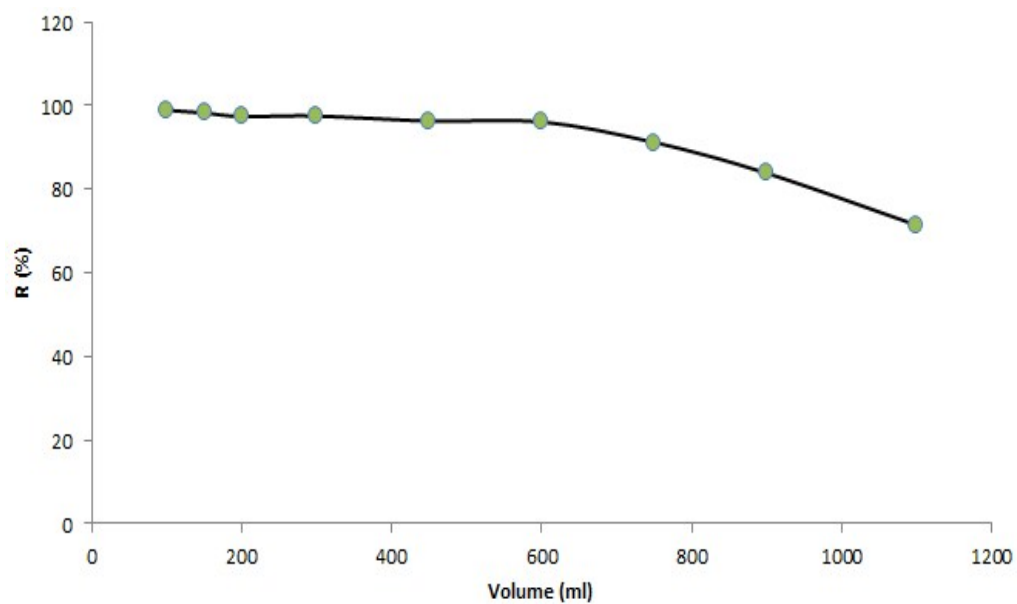

**Fig. S5.** Effect of volume of the sample solution on the extraction recovery of lead ions (Conditions: amount of sorbent, 0.004g; lead concentration, 30  $\mu\text{g/L}$ ; volume of the eluent, 3 mL; desorption time, 40min, pH, 4.8).

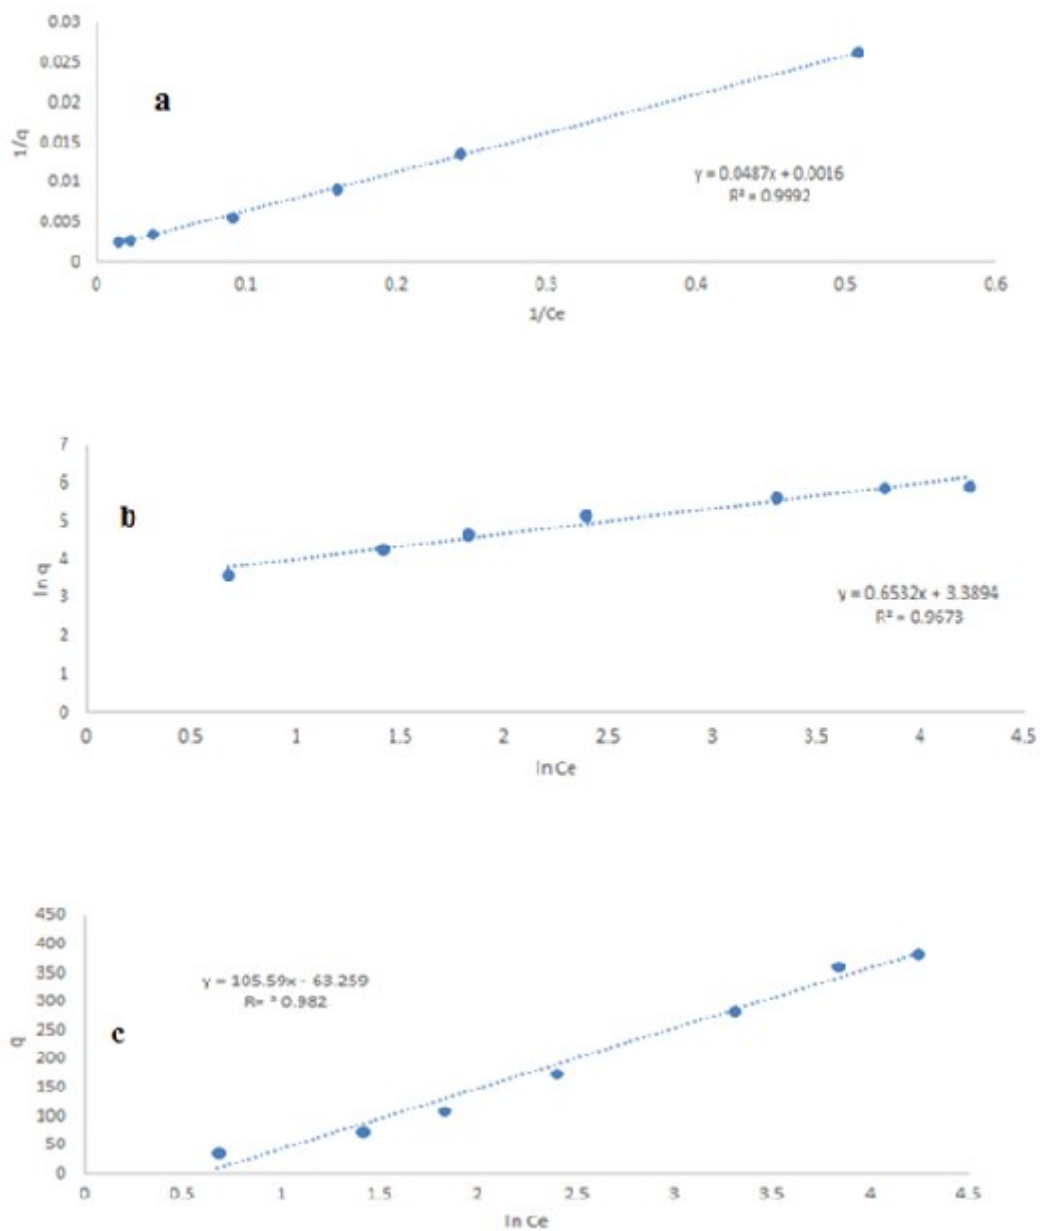

**Fig. S6.** The equilibrium isotherms (a) Langmuir (b) Freundlich (c) Temkin, for adsorption of Pb(II) ions onto Fe<sub>3</sub>O<sub>4</sub>@ Cyclam-SBA-15 at optimum conditions in some ion concentrations ranging.

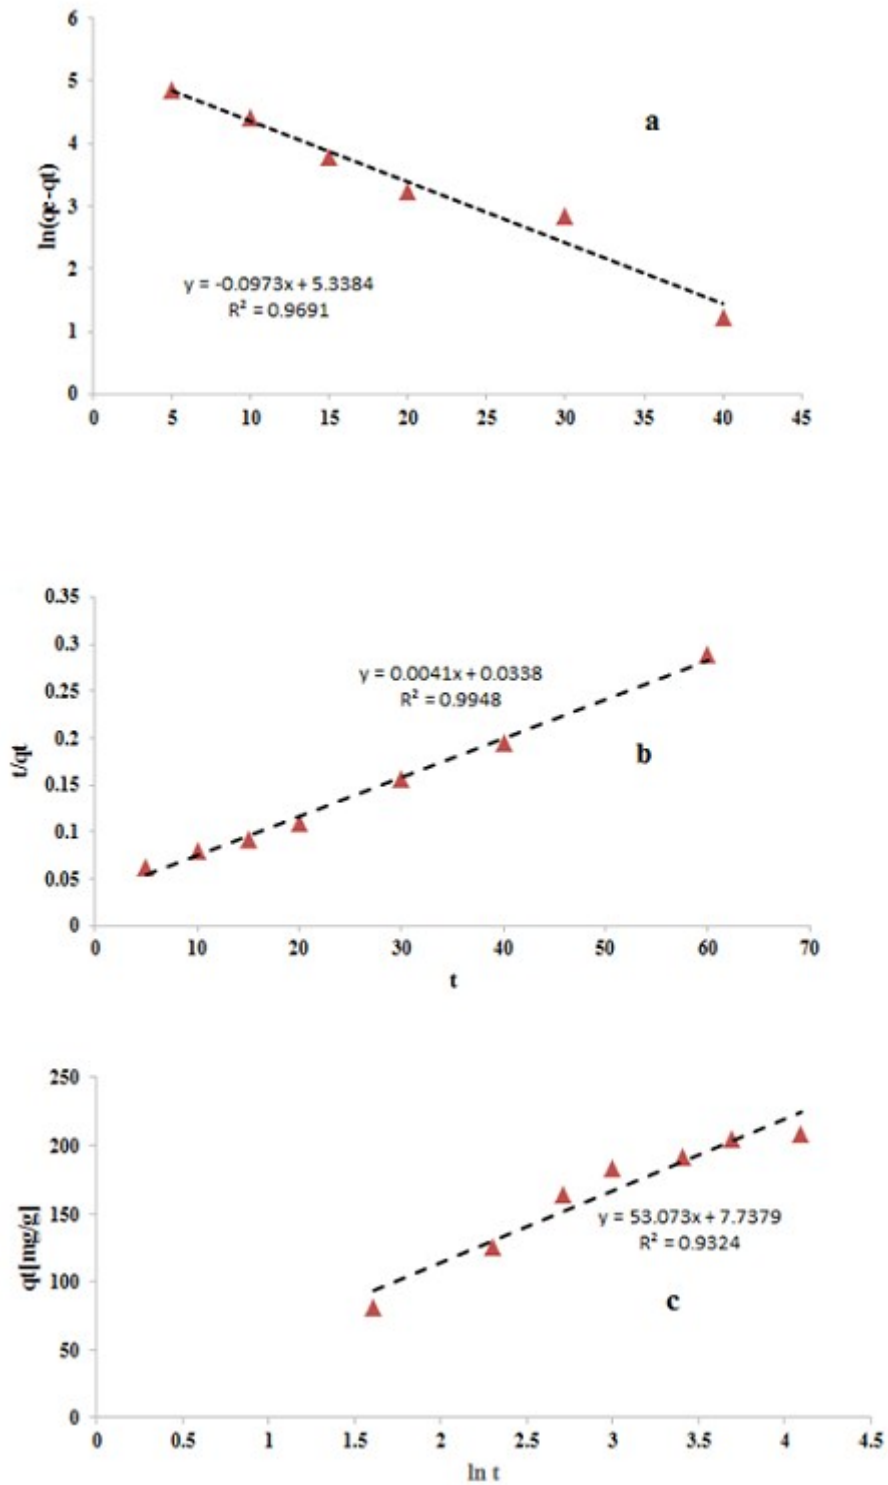

**Fig S7.** The adsorption kinetic curves related to (a) pseudo-first order (b) pseudo-second order and (c) Elovich models for adsorption of Pb(II) ions over Fe<sub>3</sub>O<sub>4</sub>@ Cyclam-SBA-15 at optimum conditions at various contact time.



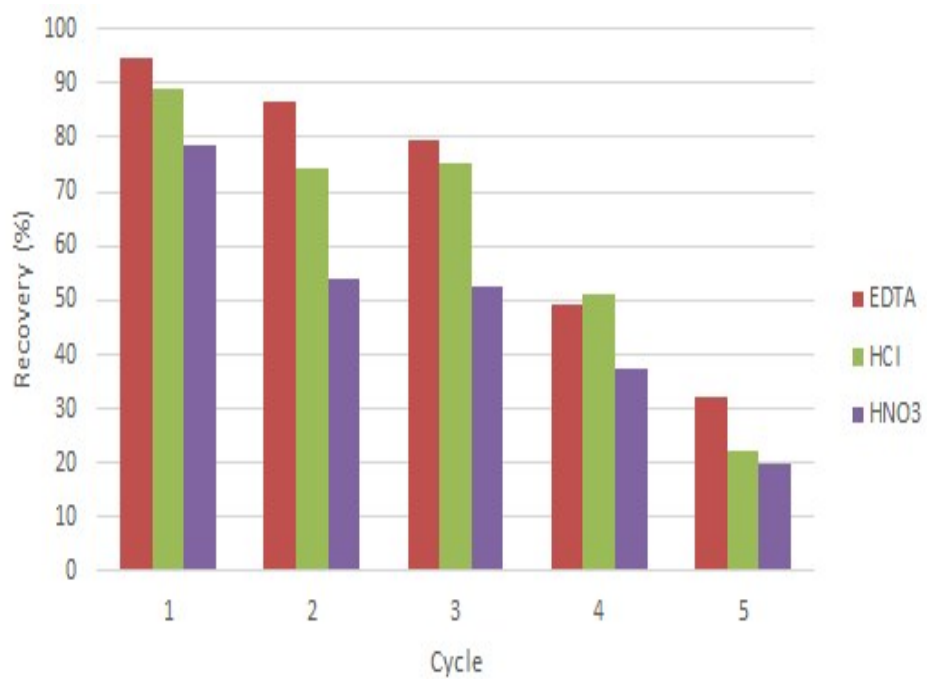

**Fig. S8.** Regeneration study after five consecutive adsorption/desorption cycles with HCl (0.01M), EDTA (0.01M) and HNO<sub>3</sub> (0.01M) eluent
